# Supplementary material for: A dual-responsive luminescent sensor based on a water-stable Cd(ii)-MOF for the highly selective and sensitive detection of acetylacetone and Cr2O72− in aqueous solutions
Source: Royal Society of Chemistry journal article supplement (doi:10.1039/c9ce01546a), 2020-01-01
Supplement: c9ce01546a1.pdf [file c9ce01546a1.pdf]

Supplementary Material (ESI) for CrystEngComm 2019

Dual-responsive luminescent sensor based on water-stable Cd(II)-MOF  
for highly selective and sensitive detection of acetylacetone and  $\text{Cr}_2\text{O}_7^{2-}$   
in aqueous solution

Ying-Jie Yang, Yue-Hua Li, Dong Liu, Guang-Hua Cui\*

*College of Chemical Engineering, Hebei Key Laboratory for Environment Photocatalytic and  
Electrocatalytic Materials, North China University of Science and Technology, No. 21 Bohai  
Road, Caofeidian new-city, Tangshan, Hebei, 063210, P. R. China*

\*Corresponding author: Guang-Hua Cui

Fax: +86-315-8805462, Tel: +86-315-8805460.

E-mail: tscghua@126.com

**Table S1** Crystal data and structure refinements for **1** and **2**.

**Table S2(a)** Selected Bond Lengths [Å] and Angles [°] for the **1**; **(b)** Selected Bond Lengths [Å] and Angles [°] for the **2**.

**Table S3** The BET surface area and porosity of **1** and **2**.

**Fig. S1** The two coordination modes of 1,4-NDC<sup>2-</sup> ligands to form a [Cd<sub>2</sub>(1,4-NDC<sup>2-</sup>)<sub>2</sub>]<sub>n</sub> unit.

**Fig. S2 (a)** Each [Cd<sub>2</sub>(1,4-NDC<sup>2-</sup>)<sub>2</sub>]<sub>n</sub> unit binds to adjacent units to form a 3D framework; **(b)** The L1 ligands bridge two Cd(II) ions.

**Fig. S3** Topological representation of the **1vt** network in **1** with [Cd<sub>2</sub>(1,4-NDC<sup>2-</sup>)<sub>2</sub>]<sub>n</sub> units selected as nodes.

**Fig. S4 (a)** The 1D waved chain [Cd(1,4-NDC<sup>2-</sup>)<sub>n</sub>] of **2**; **(b)** The similar “V” shape 1D chain [Cd(L2)]<sub>n</sub> of **2**.

**Fig. S5** The simulated from single-crystal data, obtained from the experiment powder X-ray diffraction patterns of **1** and **2**.

**Fig. S6** The TG curves of **1** and **2**.

**Fig. S7** PXRD patterns of Cd(II)-MOFs (**a** = MOF-**1**; **b** = MOF-**2**) in different pH values in the range of 3-13.

**Fig. S8** PXRD patterns of Cd(II)-MOFs (**a** = MOF-**1**; **b** = MOF-**2**) soaking in aqueous solution for 30 days.

**Fig. S9** Comparison of the quenching efficiency relative of **1** in different small organic molecules (the luminescence intensity of **1** in aqueous solution is the original value).

**Fig. S10** The luminescence intensity of **1** after sensing experiments (**a** = ACAC; **b** = Cr<sub>2</sub>O<sub>7</sub><sup>2-</sup>) five runs of recycling.

**Fig. S11** The PXRD patterns (**a** = **1** after sensing ACAC for five cycles in H<sub>2</sub>O; **b** = **1** after sensing Cr<sub>2</sub>O<sub>7</sub><sup>2-</sup> ion for five cycles in H<sub>2</sub>O).

**Fig. S12** Comparison of the quenching efficiency relative of **1** in aqueous solution in the presence of different ions (**a** = metal ions; **b** = anions, the luminescence intensity of **1** in aqueous solution is the original value).

**Fig. S13** Emission intensities of **1** dispersed in the aqueous solution of Cr<sub>2</sub>O<sub>7</sub><sup>2-</sup> in the presence of different ions.

**Fig. S14** IR spectra (**a** = powder of **1**; **b** = powder of **1** in H<sub>2</sub>O; **c** = **1** after sensing ACAC for five cycles in H<sub>2</sub>O; **d** = **1** after sensing Cr<sub>2</sub>O<sub>7</sub><sup>2-</sup> ion for five cycles in H<sub>2</sub>O).

**Fig. S15** The EDX patterns (**a** = powder of **1**; **b** = **1** after sensing for ACAC for five cycles in H<sub>2</sub>O; **c** = **1** after sensing Cr<sub>2</sub>O<sub>7</sub><sup>2-</sup> ion for five cycles in H<sub>2</sub>O).

**Fig. S16** The UV-vis spectra (**a** = small organic molecules; **b** = metal ions; **c** = anions and the excitation spectra of **1**).

**Table S1** Crystal data and structure refinements for **1** and **2**

| MOF                                                                               | <b>1</b>                                                                      | <b>2</b>                                                         |
|-----------------------------------------------------------------------------------|-------------------------------------------------------------------------------|------------------------------------------------------------------|
| Chemical formula                                                                  | C <sub>42</sub> H <sub>28</sub> N <sub>4</sub> O <sub>8</sub> Cd <sub>2</sub> | C <sub>32</sub> H <sub>26</sub> N <sub>4</sub> O <sub>4</sub> Cd |
| Formula weight                                                                    | 941.48                                                                        | 642.97                                                           |
| Crystal system                                                                    | Monoclinic                                                                    | Monoclinic                                                       |
| Space group                                                                       | <i>P</i> 2 <sub>1</sub> / <i>n</i>                                            | <i>P</i> 2 <sub>1</sub> / <i>c</i>                               |
| <i>a</i> (Å)                                                                      | 20.577(1)                                                                     | 15.503(9)                                                        |
| <i>b</i> (Å)                                                                      | 7.636(5)                                                                      | 10.572(6)                                                        |
| <i>c</i> (Å)                                                                      | 20.577(6)                                                                     | 18.453(1)                                                        |
| $\alpha$ (°)                                                                      | 90                                                                            | 90                                                               |
| $\beta$ (°)                                                                       | 94.06(1)                                                                      | 107.03(1)                                                        |
| $\gamma$ (°)                                                                      | 90                                                                            | 90                                                               |
| <i>V</i> (Å <sup>3</sup> )                                                        | 3225.0(4)                                                                     | 2891.7(3)                                                        |
| <i>Z</i>                                                                          | 4                                                                             | 4                                                                |
| <i>D</i> <sub>calcd</sub> (g/cm <sup>3</sup> )                                    | 1.939                                                                         | 1.477                                                            |
| Absorption coefficient, mm <sup>-1</sup>                                          | 1.389                                                                         | 0.799                                                            |
| <i>F</i> (000)                                                                    | 1872                                                                          | 1304                                                             |
| Crystal size, mm                                                                  | 0.25 × 0.22 × 0.21                                                            | 0.20 × 0.18 × 0.17                                               |
| $\theta$ range, deg                                                               | 2.281~28.320                                                                  | 2.246~28.326                                                     |
| Index range <i>h, k, l</i>                                                        | -27/27, -10/10, -27/27                                                        | -20/16, -14/14, -24/24                                           |
| Reflections collected                                                             | 57441                                                                         | 40688                                                            |
| Independent reflections ( <i>R</i> <sub>int</sub> )                               | 7972(0.0291)                                                                  | 7155 (0.0240)                                                    |
| Data/restraint/parameters                                                         | 7972/ 6 / 516                                                                 | 7155 / 0 / 372                                                   |
| Goodness-of-fit on <i>F</i> <sup>2</sup>                                          | 1.027                                                                         | 1.079                                                            |
| Final <i>R</i> <sub>1</sub> , <i>wR</i> <sub>2</sub> ( <i>I</i> > 2σ( <i>I</i> )) | 0.0211, 0.0566                                                                | 0.0267, 0.0996                                                   |
| Largest diff. peak and hole                                                       | 1.523, -0.805                                                                 | 0.418, -0.987                                                    |

**Table S2(a)** Selected Bond Lengths [ $\text{\AA}$ ] and Angles [ $^\circ$ ] for the **1**

| Parameter         | Value    | Parameter         | Value    |
|-------------------|----------|-------------------|----------|
| <b>1</b>          |          |                   |          |
| Cd(1)–O(1)        | 2.270(2) | Cd(1)–O(7)A       | 2.258(2) |
| Cd(1)–O(8)A       | 2.576(2) | Cd(1)–O(8)B       | 2.323(2) |
| Cd(1)–O(2)C       | 2.338(2) | Cd(1)–N(1)        | 2.241(2) |
| Cd(2)–O(4)        | 2.210(2) | Cd(2)–O(5)        | 2.279(2) |
| Cd(2)–O(3)D       | 2.319(2) | Cd(2)–O(6)D       | 2.366(2) |
| Cd(2)–N(2)        | 2.224(2) |                   |          |
| N(1)–Cd(1)–O(7)A  | 166.5(8) | N(1)–Cd(1)–O(1)   | 97.5(7)  |
| O(7)A–Cd(1)–O(1)  | 85.6(8)  | N(1)–Cd(1)–O(8)B  | 100.7(7) |
| O(7)A–Cd(1)–O(8)B | 92.5(6)  | O(1)–Cd(1)–O(8)B  | 87.8(7)  |
| N(1)–Cd(1)–O(2)C  | 85.4(7)  | O(7)A–Cd(1)–O(2)C | 93.5(8)  |
| O(1)–Cd(1)–O(2)C  | 171.2(8) | O(8)B–Cd(1)–O(2)C | 83.4(7)  |
| N(1)–Cd(1)–O(8)A  | 113.1(7) | O(7)A–Cd(1)–O(8)A | 53.8(6)  |
| O(1)–Cd(1)–O(8)A  | 87.6(6)  | O(8)B–Cd(1)–O(8)A | 146.2(4) |
| O(2)C–Cd(1)–O(8)A | 99.0(6)  | O(4)–Cd(2)–N(2)   | 160.4(8) |
| O(4)–Cd(2)–O(5)   | 92.9(8)  | N(2)–Cd(2)–O(5)   | 102.6(7) |
| O(4)–Cd(2)–O(3)D  | 90.1 (6) | N(2)–Cd(2)–O(3)D  | 101.2(7) |
| O(5)–Cd(2)–O(3)D  | 92.2(7)  | O(4)–Cd(2)–O(6)D  | 85.9(7)  |
| N(2)–Cd(2)–O(6)D  | 80.5(7)  | O(5)–Cd(2)–O(6)D  | 171.7(7) |
| O(3)D–Cd(2)–O(6)D | 79.6(7)  |                   |          |

Symmetry codes for **1**: A =  $x+1/2, -y+3/2, z-1/2$ ; B =  $-x+1, -y+1, -z+1$ ; C =  $-x+3/2, y-1/2, -z+1/2$ ; D =  $-x+1/2, y-1/2, -z+1/2$ .

**Table S2(b)** Selected Bond Lengths [ $\text{\AA}$ ] and Angles [ $^\circ$ ] for the **2**

| Parameter         | Value    | Parameter        | Value    |
|-------------------|----------|------------------|----------|
| <b>2</b>          |          |                  |          |
| Cd(1)–O(1)        | 2.243(2) | Cd(1)–O(2)       | 2.463(2) |
| Cd(1)–O(3)A       | 2.234(2) | Cd(1)–O(4)A      | 2.526(2) |
| Cd(1)–N(1)        | 2.292(2) | Cd(1)–N(3)       | 2.325(2) |
| O(3)A–Cd(1)–O(1)  | 141.6(8) | O(3)A–Cd(1)–N(1) | 98.6(7)  |
| O(1)–Cd(1)–N(1)   | 114.6(7) | O(3)A–Cd(1)–N(3) | 104.9(8) |
| O(1)–Cd(1)–N(3)   | 95.5(6)  | N(1)–Cd(1)–N(3)  | 87.8(6)  |
| O(3)A–Cd(1)–O(2)  | 107.8(9) | O(1)–Cd(1)–O(2)  | 54.4(7)  |
| N(1)–Cd(1)–O(2)   | 92.7(7)  | N(3)–Cd(1)–O(2)  | 146.8(7) |
| O(3)A–Cd(1)–O(4)A | 53.8(6)  | O(1)–Cd(1)–O(4)A | 89.3(7)  |
| N(1)–Cd(1)–O(4)A  | 150.7(6) | N(3)–Cd(1)–O(4)A | 107.5(7) |
| O(2)–Cd(1)–O(4)A  | 87.8(8)  |                  |          |

Symmetry codes for **2**: A =  $x, -y+3/2, z-1/2$ .

**Table S3** The BET surface area and porosity of **1** and **2**

| MOFs     | BET surface area (m <sup>2</sup> /g) | Porosity (cm <sup>3</sup> /g) |
|----------|--------------------------------------|-------------------------------|
| <b>1</b> | 3.414                                | 0.0003                        |
| <b>2</b> | 0.453                                | 0.0009                        |

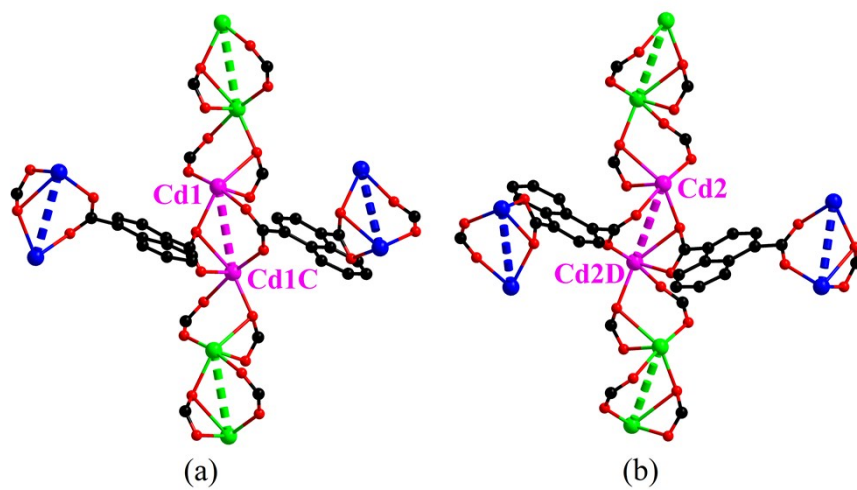

**Fig. S1** The two coordination modes of 1,4-NDC<sup>2-</sup> ligands to form a [Cd<sub>2</sub>(1,4-NDC<sup>2-</sup>)<sub>2</sub>]<sub>n</sub> unit.



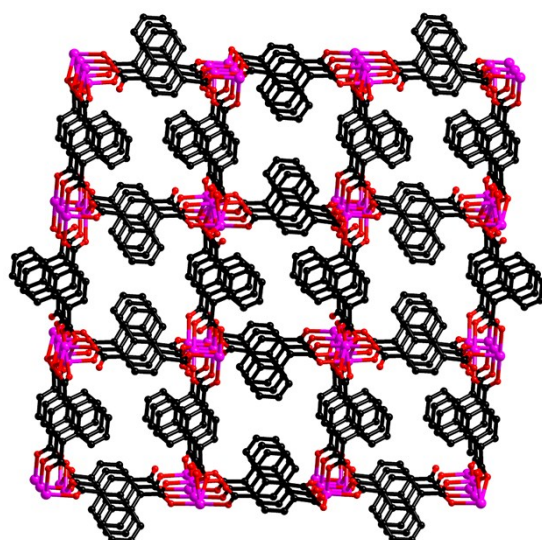

(a)

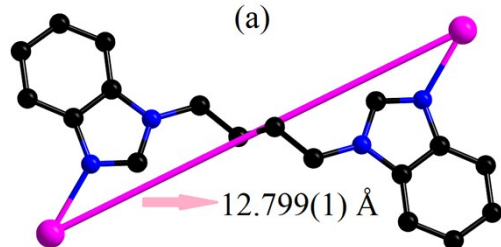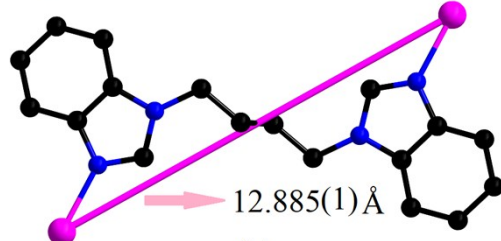

(b)

**Fig. S2** (a) Each [Cd<sub>2</sub>(1,4-NDC<sup>2-</sup>)<sub>2</sub>]<sub>n</sub> unit binds to adjacent units to form a 3D framework; (b) The L1 ligands bridge two Cd(II) ions.

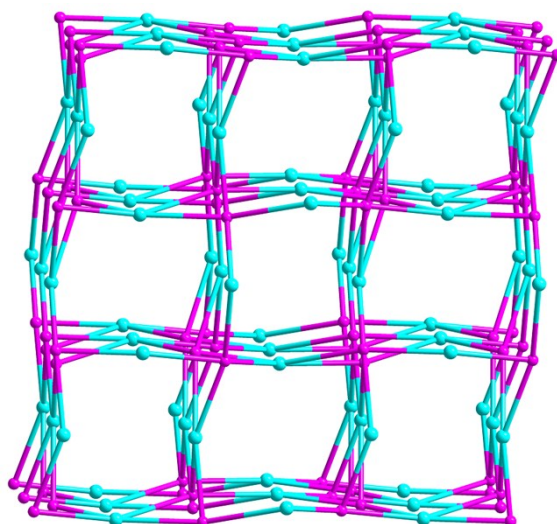

**Fig. S3** Topological representation of the *lvt* network in **1** with  $[\text{Cd}_2(1,4\text{-NDC}^{2-})_2]_n$  units selected as nodes.

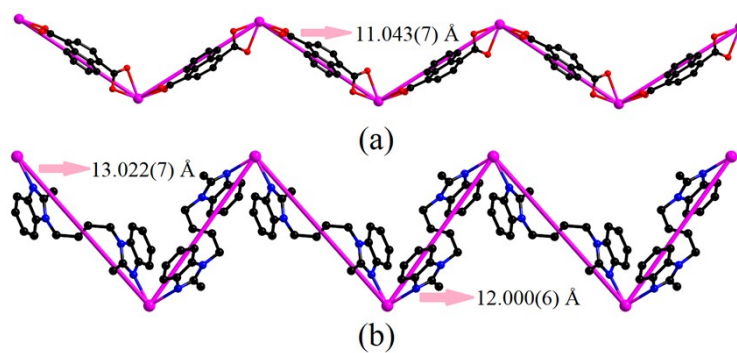

**Fig. S4** (a) The 1D waved chain  $[\text{Cd}(1,4\text{-NDC})]_n$  of **2**; (b) The similar “V” shape 1D chain  $[\text{Cd}(\text{L2})]_n$  of **2**.

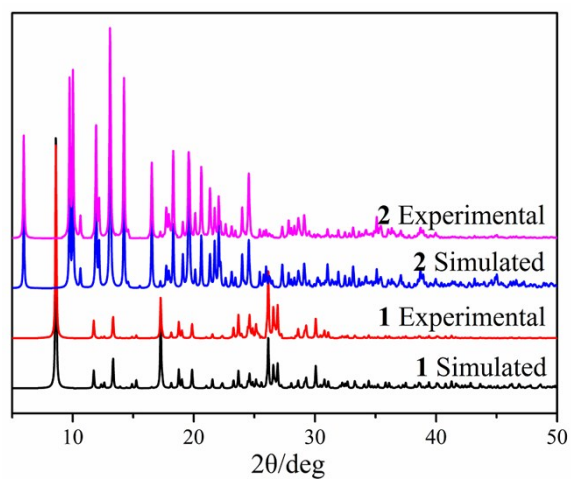

**Fig. S5** The simulated from single-crystal data, obtained from the experiment powder X-ray diffraction patterns of **1** and **2**.

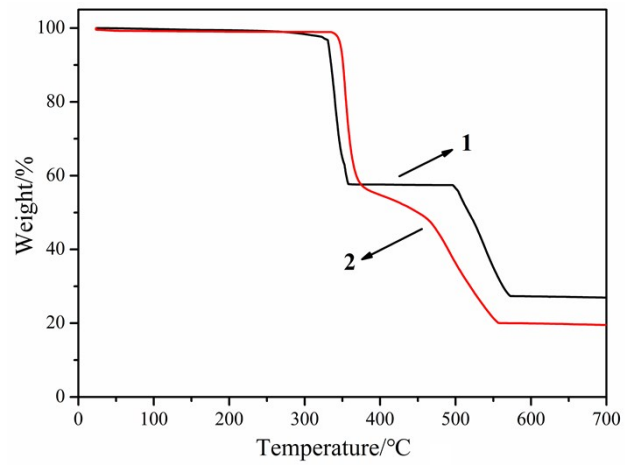

**Fig. S6** The TG curves of **1** and **2**.

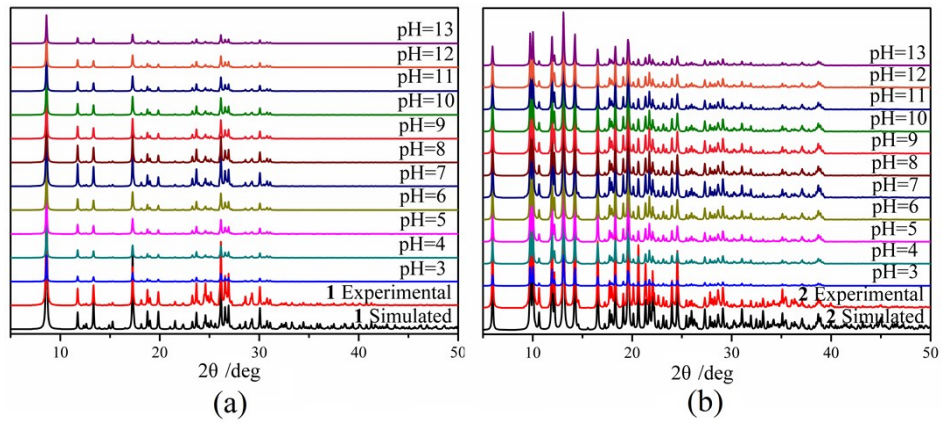

**Fig. S7** PXRD patterns of Cd(II)-MOFs (**a** = MOF-1; **b** = MOF-2) in different pH values in the range of 3~13.

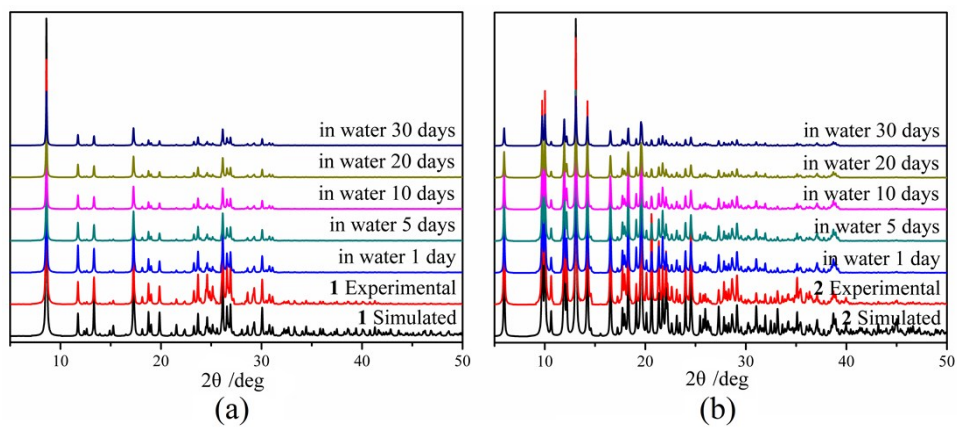

**Fig. S8** PXRD patterns of Cd(II)-MOFs (**a** = MOF-1; **b** = MOF-2) soaking in aqueous solution for 30 days.

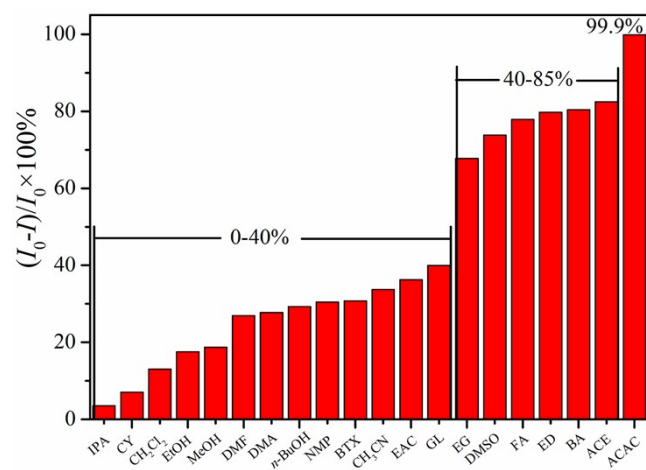

**Fig. S9** Comparison of the quenching efficiency relative of **1** in different small organic molecules (the luminescence intensity of **1** in aqueous solution is the original value).



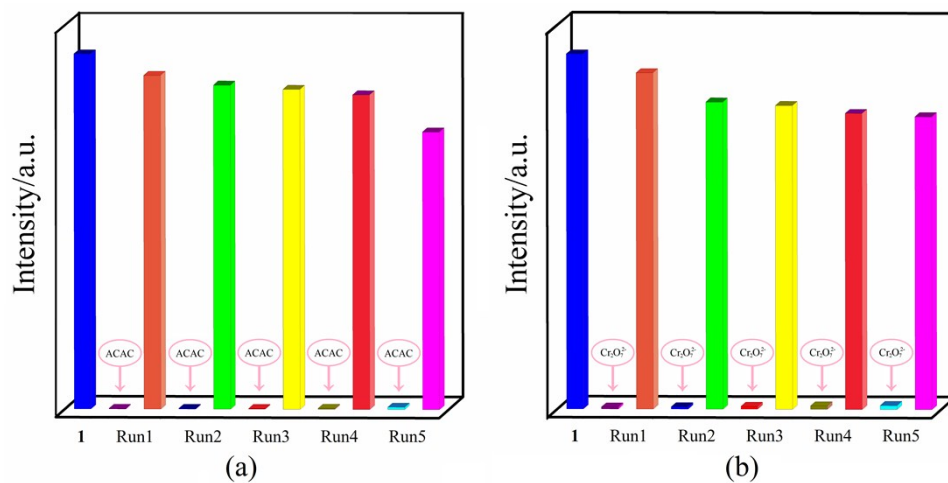

**Fig. S10** The luminescence intensity of **1** after sensing experiments (**a** = ACAC; **b** =  $\text{Cr}_2\text{O}_7^{2-}$ ) five runs of recycling.

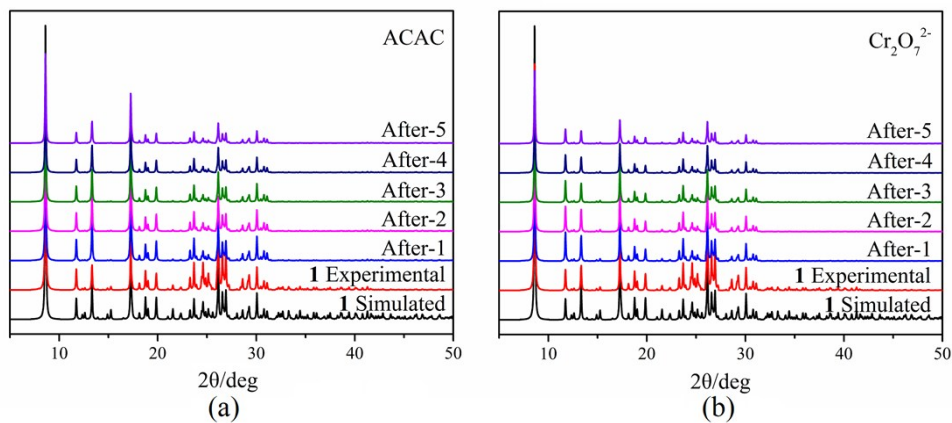

**Fig. S11** The PXRD patterns (**a** = **1** after sensing ACAC for five cycles in H<sub>2</sub>O; **b** = **1** after sensing Cr<sub>2</sub>O<sub>7</sub><sup>2-</sup> ion for five cycles in H<sub>2</sub>O).

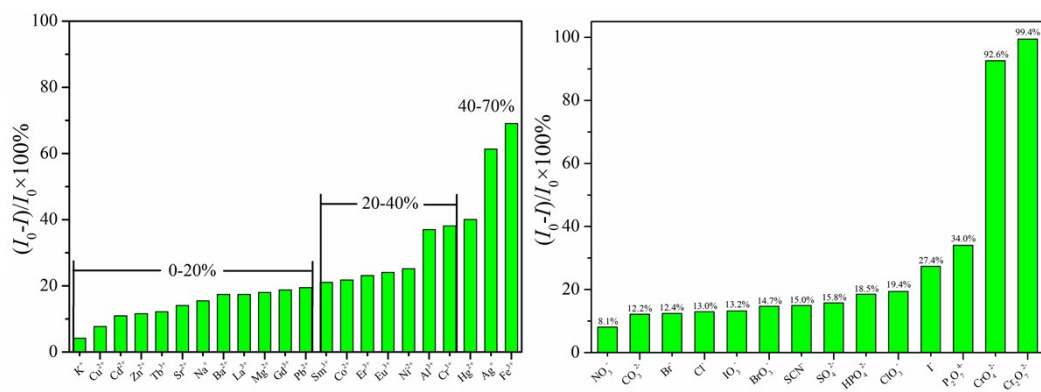

**Fig. S12** Comparison of the quenching efficiency relative of **1** in aqueous solution in the presence of different ions (**a** = metal ions; **b** = anions, the luminescence intensity of **1** in aqueous solution is the original value).

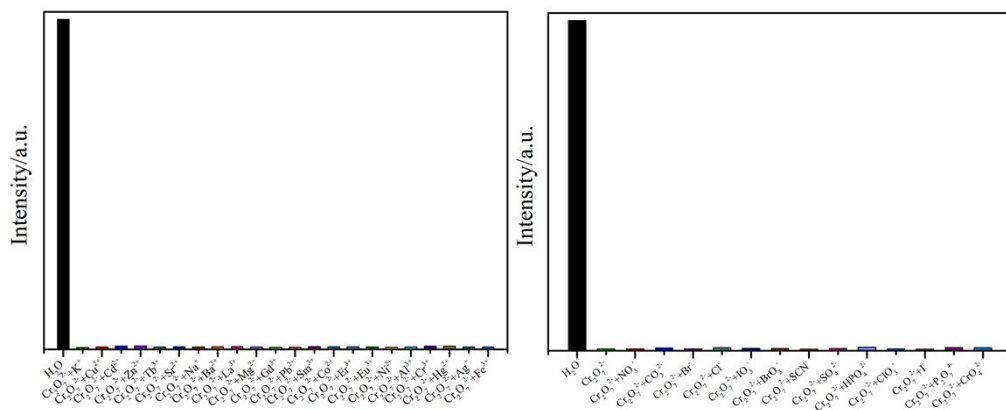

**Fig. S13** Emission intensities of **1** dispersed in the aqueous solution of  $\text{Cr}_2\text{O}_7^{2-}$  in the presence of different ions.

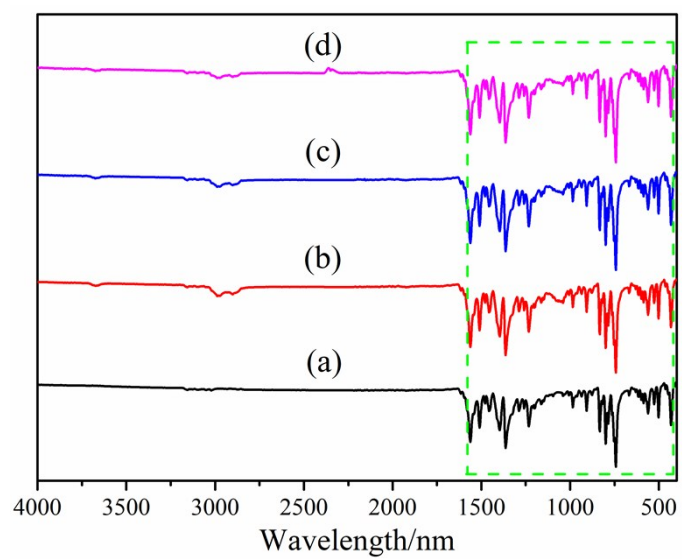

**Fig. S14** IR spectra (**a** = powder of **1**; **b** = powder of **1** in H<sub>2</sub>O; **c** = **1** after sensing ACAC for five cycles in H<sub>2</sub>O; **d** = **1** after sensing Cr<sub>2</sub>O<sub>7</sub><sup>2-</sup> ion for five cycles in H<sub>2</sub>O).

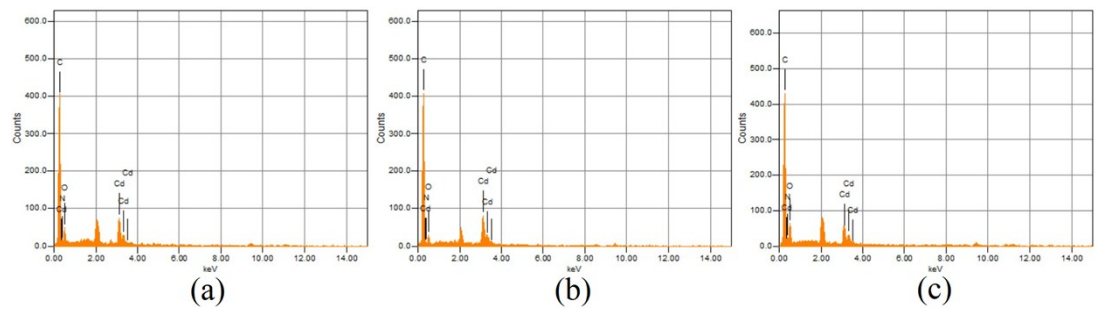

**Fig. S15** The EDX patterns (**a** = powder of **1**; **b** = **1** after sensing for ACAC for five cycles in H<sub>2</sub>O; **c** = **1** after sensing Cr<sub>2</sub>O<sub>7</sub><sup>2-</sup> ion for five cycles in H<sub>2</sub>O).

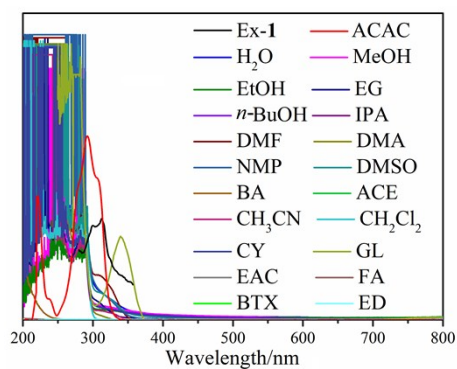

(a)

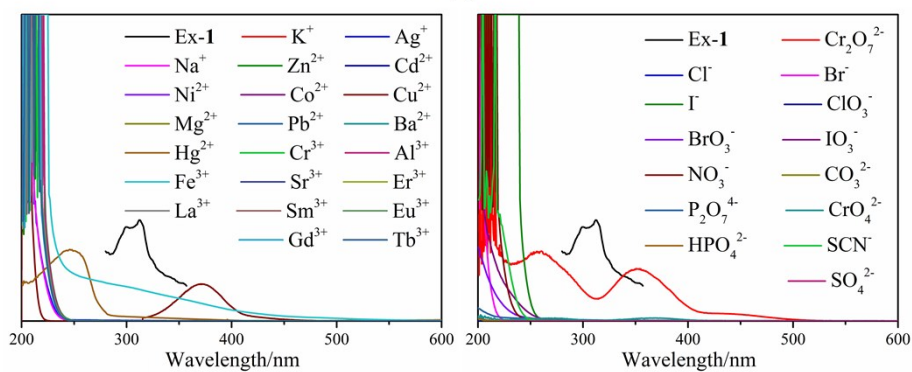

(b)

(c)

**Fig. S16** The UV-vis spectra (**a** = small organic molecules; **b** = metal ions; **c** = anions and the excitation spectra of **1**).
